# Supplementary material
Source: HighWire-hosted journal article supplement (https://ard.bmj.com/content/79/9/1174)
Supplement: inline-supplementary-material-1 [file inline-supplementary-material-1.pdf]

|                                         | Tapering csDMARD first (n=94) | Tapering TNF-inhibitor first (n=95) |
|-----------------------------------------|-------------------------------|-------------------------------------|
| Oral glucocorticoids*, n (%)            | 5 (5)                         | 6 (6)                               |
| Intra-articular glucocorticoids*, n (%) | 20 (21)                       | 23 (24)                             |
| Intramuscular glucocorticoids*, n (%)   | 7 (7)                         | 11 (12)                             |

\*Numbers indicate number of patients who used glucocorticoids within the two years of follow-up.  
csDMARD: conventional synthetic disease modifying anti-rheumatic drug, TNF: tumor necrosis factor.

**Supplemental table S1 Glucocorticoid use within two years of follow-up**
